# Supplementary material
Source: PubMed Central journal article supplement (PMC4155453)
Supplement: supp_btu309_glabd-SI-R.pdf [file supp_btu309_glabd-SI-R.pdf]

## Supporting Information

### Structural and Energetic Determinants of Tyrosylprotein Sulfotransferase Sulfation Specificity

Praveen Nedumpully-Govindan<sup>1</sup>, Lin Li<sup>1</sup>, Emil G. Alexov<sup>1</sup>, Mark Blenner<sup>2</sup>, Feng Ding<sup>1</sup>

<sup>1</sup>Department of Physics and Astronomy, Clemson University, Clemson, SC 29634, USA

<sup>2</sup>Department of Chemical and Biomolecular Engineering, Clemson University, Clemson, SC 29634, USA

**Table S1.**

The sequences of wild type and mutants of gastrin used to study the correlation between sulfation rate and sulfation energy [1]. The mutated residues are highlighted in bold.

| Peptide           | Sequence                                                                                               | Sulfation Rate (%) | Sulfation Energy (kcal/mol) |
|-------------------|--------------------------------------------------------------------------------------------------------|--------------------|-----------------------------|
| Wild type gastrin | pGlu-Gly-Pro-Trp-Leu-Glu-Glu-Glu-Glu-Glu-Ala-Tyr-Gly-Trp-Met-Asp-Phe-NH <sub>2</sub>                   | 71.8 ± 7.2         | 3.36                        |
| YE-gastrin        | pGlu-Gly-Pro-Trp-Leu-Glu-Glu-Glu-Glu-Glu-Ala-Tyr- <b>Glu</b> -Trp-Met-Asp-Phe-NH <sub>2</sub>          | 59.9 ± 1.5         | -0.26                       |
| YA-gastrin        | pGlu-Gly-Pro-Trp-Leu-Glu-Glu-Glu-Glu-Glu-Ala-Tyr- <b>Ala</b> -Trp-Met-Asp-Phe-NH <sub>2</sub>          | 90.2 ± 1.7         | 5.28                        |
| EDY-gastrin       | pGlu-Gly-Pro-Trp-Leu-Glu-Glu-Glu-Glu-Glu- <b>Asp</b> -Tyr-Gly-Trp-Met-Asp-Phe-NH <sub>2</sub>          | 100.0 ± 0.0        | -2.83                       |
| ERY-gastrin       | pGlu-Gly-Pro-Trp-Leu-Glu-Glu-Glu-Glu-Glu- <b>Arg</b> -Tyr-Gly-Trp-Met-Asp-Phe-NH <sub>2</sub>          | 0.0 ± 0.0          | 6.48                        |
| KAY-gastrin       | pGlu-Gly-Pro-Trp-Leu-Glu-Glu-Glu-Glu- <b>Lys</b> -Ala-Tyr-Gly-Trp-Met-Asp-Phe-NH <sub>2</sub>          | 86.6 ± 3.9         | 3.96                        |
| AAAY-gastrin      | pGlu-Gly-Pro-Trp-Leu-Glu-Glu-Glu-Glu- <b>Ala</b> -Ala-Tyr-Gly-Trp-Met-Asp-Phe-NH <sub>2</sub>          | 91.1 ± 3.1         | 1.49                        |
| AEAY-gastrin      | pGlu-Gly-Pro-Trp-Leu-Glu-Glu-Glu- <b>Ala</b> -Glu-Ala-Tyr-Gly-Trp-Met-Asp-Phe-NH <sub>2</sub>          | 61.1 ± 1.7         | 8.39                        |
| AEEAY-gastrin     | pGlu-Gly-Pro-Trp-Leu-Glu-Glu- <b>Ala</b> -Glu-Glu-Ala-Tyr-Gly-Trp-Met-Asp-Phe-NH <sub>2</sub>          | 70.8 ± 1.4         | 3.89                        |
| AEEAY-gastrin     | pGlu-Gly-Pro-Trp-Leu-Glu- <b>Ala</b> -Glu-Glu-Glu-Ala-Tyr-Gly-Trp-Met-Asp-Phe-NH <sub>2</sub>          | 70.7 ± 6.2         | 4.83                        |
| HDHDY-gastrin     | pGlu-Gly-Pro-Trp-Leu-Glu-Glu- <b>His-Asp-His-Asp</b> -Tyr-Gly-Trp-Met-Asp-Phe-NH <sub>2</sub>          | 100.0 ± 0          | 0.74                        |
| HDHAY-gastrin     | pGlu-Gly-Pro-Trp-Leu-Glu-Glu- <b>His-Asp-His</b> -Ala-Tyr-Gly-Trp-Met-Asp-Phe-NH <sub>2</sub>          | 89.6 ± 1.1         | 2.52                        |
| KEEAY-gastrin     | pGlu-Gly-Pro-Trp-Leu-Glu- <b>Lys</b> -Glu-Glu- <b>Ala</b> -Ala-Tyr-Gly-Trp-Met-Asp-Phe-NH <sub>2</sub> | 87.9 ± 2.4         | 5.29                        |

#### Reference:

[1] J. R. Bundgaard, J. Vuust, and J. F. Rehfeld, "New Consensus Features for Tyrosine O-Sulfation Determined by Mutational Analysis," *J. Biol. Chem.*, vol. 272, no. 35, pp. 21700–21705, Aug. 1997.

**A**

|        |     |                                                                                                      |     |
|--------|-----|------------------------------------------------------------------------------------------------------|-----|
| TPST-1 | 5   | LKQ <del>N</del> LLACLVISSVTVFYLGQHAMECHHRIEERSQPVKLESTRTTVRTGLD----LKAN                             | 60  |
|        |     | +++ LL A + V LGQ +EC R+ L S R +R + + N                                                               |     |
| TPST-2 | 5   | RRRVLLAAGCALVLVLA <del>V</del> QLGQ <del>V</del> LEC-----RAVLAGLRSPRGAMRPEQEELVMVGTN                 | 58  |
| TPST-1 | 61  | KT-FAYHKMPLIFIGGVPRSGTTLMRAMLDAHPDIRCGEETRVIPRILALKQMW <del>S</del> R <del>S</del>                   | 119 |
|        |     | + Y K MPLIF+GGVPRSGTTLMRAMLDAHP++RCGEETR+IPR+LA++Q WS+S +                                            |     |
| TPST-2 | 59  | HVEYRYGKAMPLIFVGGVPRSGTTLMRAMLDAHPEVRCGEETRIIPRVLAMRQAWSK <del>S</del>                               | 118 |
| TPST-1 | 120 | EKIRLDEAGVTDEVLD <del>S</del> AMQAFLEIIVKHGEPAPYLCNKDPFALKSLTYLSR <del>L</del> FPNAKF                | 179 |
|        |     | EK+RLDEAGVTDEVLD+AMQAF+LE+I KHGEP A LCNKDPF LKS YLSR <del>L</del> FPN+KF                             |     |
| TPST-2 | 119 | EKLRLDEAGVTDEVLD <del>A</del> AMQAF ILEVIAKHGEPARVLCNKDPFTL <del>K</del> SSVYLSR <del>L</del> FPNSKF | 178 |
| TPST-1 | 180 | LLMVRDGRASVHSMISRKVTIAGFDLNSYRDCLTKWNRAIETMYNQCMEVG <del>Y</del> KKCLMVHY                            | 239 |
|        |     | LLMVRDGRASVHSMI+RKVTIAGFDL+SYRDCLTKWN+AIE MY QCMEVG +KC+ V+Y                                         |     |
| TPST-2 | 179 | LLMVRDGRASVHSMITRKVTIAGFDLSSYRDCLTKWNKAIEVMYAQCMEVG <del>K</del> EKCLPVYY                            | 238 |
| TPST-1 | 240 | EQLVLHPERWMRTLLKFLQIPWNH <del>S</del> VLHHEMIGKAGGVSLSKVERSTDQVIKPVNVGAL                             | 299 |
|        |     | EQLVLHP R ++ +L FL I W+ +VLHHE++IGK GGVSLSK+ERSTDQVIKPVN+ AL                                         |     |
| TPST-2 | 239 | EQLVLHPRRSLKLILD <del>F</del> LGI <del>A</del> WSDAVLHHE <del>D</del> LIGKPGGVSLSKIERSTDQVIKPVNLEAL  | 298 |
| TPST-1 | 300 | SKWVGKIPPDVLDQMAVIAPMLAKLGYDPYANPPNYGKPDPKI <del>E</del> NTRRVYKGEFQLPDF                             | 359 |
|        |     | SKW G IP DV++DMA IAPMLA+LGYDPYANPPNYG PDP +I NT+RV KG+++ P                                           |     |
| TPST-2 | 299 | SKWTGHIPGDVVRDMAQIAPMLAQLGYDPYANPPNYGNPDPFVINNTQRVLKGDYKTPAN                                         | 358 |
| TPST-1 | 360 | LKEK <del>P</del> QTEQ                                                                               | 368 |
|        |     | LK Q Q                                                                                               |     |
| TPST-2 | 359 | LKGYFQVNQ                                                                                            | 367 |

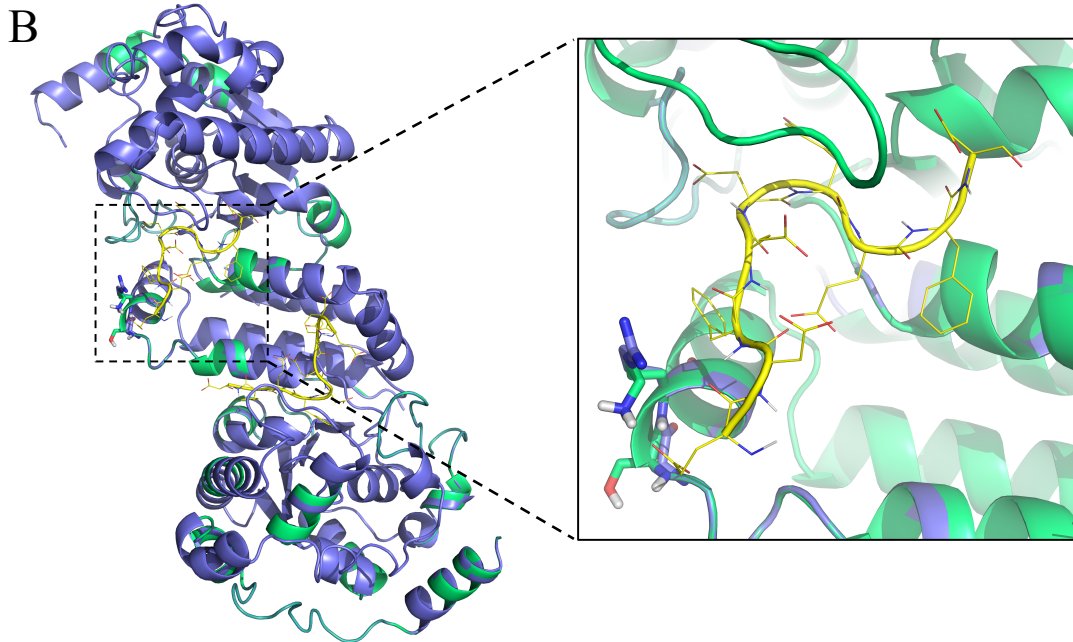

**Figure S1. Comparison between two isoforms of TPST.** (A) The sequence alignment of two TPST isoforms, TPST-1 and TPST-2. The highlighted region indicates the two mutations near the binding pockets. One of the mutations maintains the charge. The difference between the TPST-1 and TPST-2, with respect to the peptide-binding is thus not significant. (B) The crystal structure of TPST-2 (purple) and a homology model of TPST-1 (green) are very similar. Thus the method described in this work should be transferable to TPST-1.

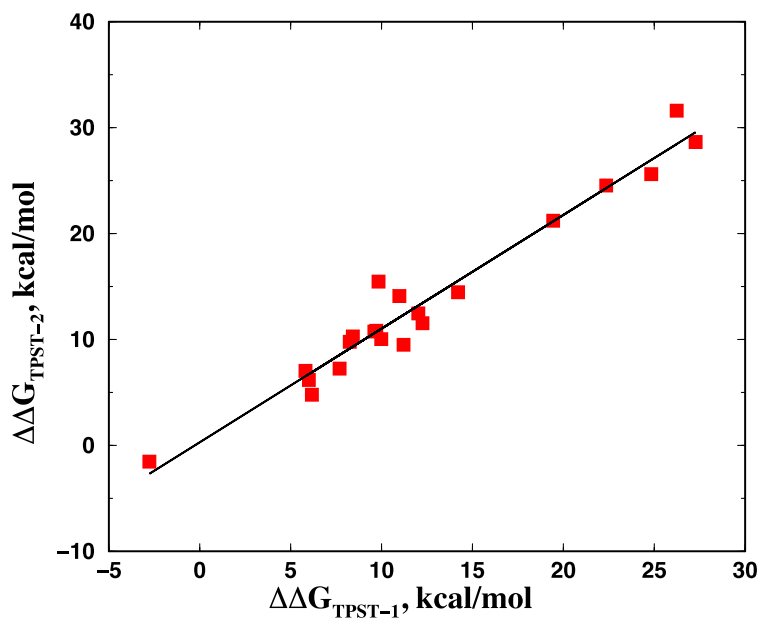

**Figure S2. Sulfation energies estimated using two isoforms of TPST.** The scatter plot of  $\Delta\Delta G_{bind}$  values for TPST-1 and TPST-2 features a high correlation with the Pearson correlation coefficient  $r = 0.98$ . A linear regression results in the slope of 1.07 and an offset of 0.28 kcal/mol.
